# Supplementary material for: Impacts of Climate Change and Anthropogenic Activities on the Net Primary Productivity of Grassland in the Southeast Tibetan Plateau
Source: MDPI journal article supplement (doi:10.3390/atmos14081217), 2023-07-28
Supplement: s1 [file s1]

## Supplementary Materials:

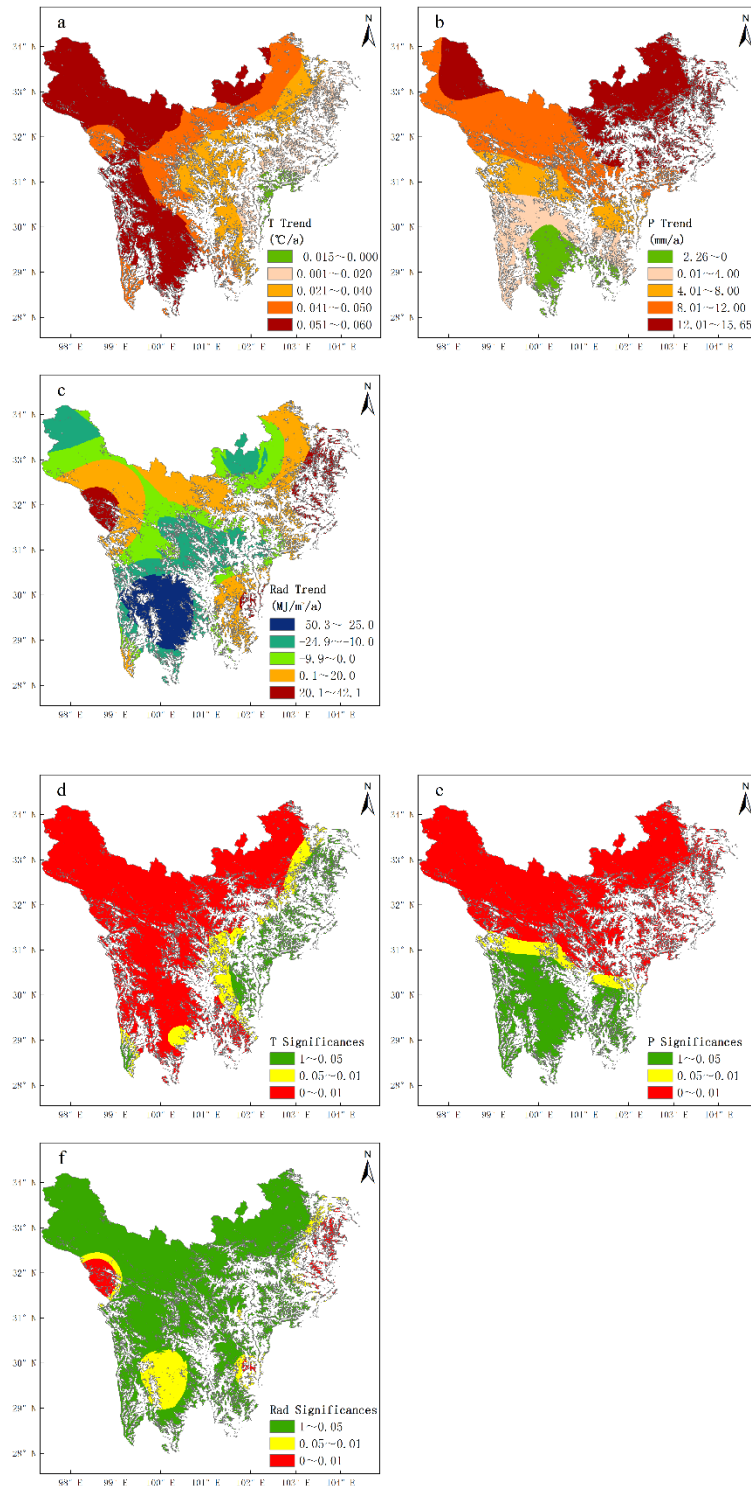

**Figure S1.** Spatial distributions of the variation trends and the corresponding significances of (a, d) annual mean temperature, (b, e) annual precipitation, and (c, f) annual solar radiation in the NWSP during 2001–2020.

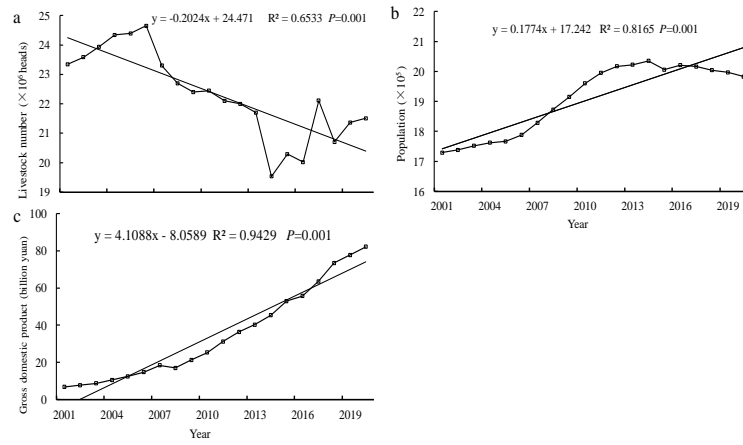

**Figure S2.** Inter-annual variations of (a) total livestock number, (b) total population and (c) gross domestic product in the NWSP during 2001–2020.
